# Supplementary material
Source: publisher figshare collection journal article supplement (https://sage.figshare.com/ndownloader/files/20161826)
Supplement: Supplementary file 1 [file 20161826]

**Table 4 Supplement. Mediating Effects of Managerial Responses (ELA)**

|                                                     | First condition      | Second condition                                    |                                                 |                                                |                                         | Third and fourth conditions |                      |
|-----------------------------------------------------|----------------------|-----------------------------------------------------|-------------------------------------------------|------------------------------------------------|-----------------------------------------|-----------------------------|----------------------|
|                                                     | ELA without mediator | Per-pupil general operating spending (in thousands) | Per-pupil instructional spending (in thousands) | Per-pupil debt service spending (in thousands) | Per-pupil other spending (in thousands) | ELA with mediator           | ELA with mediator    |
| <b>Financial Condition Measures</b>                 |                      |                                                     |                                                 |                                                |                                         |                             |                      |
| Per-pupil debt burden (log)                         | -0.053***<br>(0.017) | -1.218***<br>(0.282)                                | -0.189***<br>(0.060)                            | 0.736***<br>(0.052)                            | -0.015<br>(0.067)                       | -0.053***<br>(0.017)        | -0.050***<br>(0.017) |
| <b>Mediators</b>                                    |                      |                                                     |                                                 |                                                |                                         |                             |                      |
| Per-pupil general operating spending (in thousands) |                      |                                                     |                                                 |                                                |                                         | -6.51e-05<br>(0.002)        |                      |
| Per-pupil instructional spending (in thousands)     |                      |                                                     |                                                 |                                                |                                         |                             | 0.016**<br>(0.008)   |
| <b>Control Variables</b>                            |                      |                                                     |                                                 |                                                |                                         |                             |                      |
| Population (log)                                    | 0.514**<br>(0.213)   | -1.765<br>(1.574)                                   | -0.663<br>(0.510)                               | -0.164<br>(0.257)                              | -1.035<br>(0.902)                       | 0.514**<br>(0.214)          | 0.525**<br>(0.216)   |
| % Free-lunch eligibility                            | -0.010***<br>(0.001) | -0.009<br>(0.009)                                   | -0.004<br>(0.004)                               | -0.001<br>(0.002)                              | -0.006<br>(0.007)                       | -0.010***<br>(0.001)        | -0.010***<br>(0.001) |
| % English learners                                  | 0.035<br>(0.035)     | -0.042<br>(0.061)                                   | -0.016<br>(0.019)                               | -0.002<br>(0.012)                              | 0.051<br>(0.041)                        | 0.035<br>(0.035)            | 0.035<br>(0.035)     |
| % Black                                             | 0.003<br>(0.007)     | -0.002<br>(0.032)                                   | 0.067***<br>(0.018)                             | -0.006<br>(0.009)                              | 0.096***<br>(0.026)                     | 0.003<br>(0.007)            | 0.002<br>(0.007)     |
| % Hispanic                                          | -0.008<br>(0.006)    | 0.016<br>(0.020)                                    | 0.008<br>(0.010)                                | -0.021***<br>(0.006)                           | 0.013<br>(0.019)                        | -0.008<br>(0.006)           | -0.008<br>(0.006)    |
| Per-capita personal income (in thousands)           | 0.026***<br>(0.004)  | 0.074***<br>(0.028)                                 | -0.011<br>(0.013)                               | -0.010<br>(0.009)                              | -0.063***<br>(0.024)                    | 0.026***<br>(0.004)         | 0.026***<br>(0.004)  |
| Unemployment rate                                   | 0.007<br>(0.020)     | 0.203<br>(0.162)                                    | -0.092<br>(0.060)                               | 0.070*<br>(0.036)                              | -0.124<br>(0.133)                       | 0.007<br>(0.020)            | 0.008<br>(0.020)     |
| Constant                                            | -5.272***<br>(2.027) | 25.880<br>(16.530)                                  | 18.900***<br>(4.959)                            | -3.528<br>(2.585)                              | 20.550**<br>(8.711)                     | -5.270***<br>(2.038)        | -5.579***<br>(2.083) |
| Observations                                        | 5,939                | 5,939                                               | 5,939                                           | 5,939                                          | 5,939                                   | 5,939                       | 5,939                |
| R <sup>2</sup>                                      | 0.067                | 0.075                                               | 0.105                                           | 0.125                                          | 0.188                                   | 0.067                       | 0.069                |
| District FE                                         | Yes                  | Yes                                                 | Yes                                             | Yes                                            | Yes                                     | Yes                         | Yes                  |
| Year FE                                             | Yes                  | Yes                                                 | Yes                                             | Yes                                            | Yes                                     | Yes                         | Yes                  |

Robust clustered standard errors in parentheses (clustered at the school district level); \*\*\* p<0.01, \*\* p<0.05, \* p<0.1

Note: The per-pupil debt burden is two-year moving averaged.
